# Supplementary material
Source: PubMed Central journal article supplement (PMC2711503)

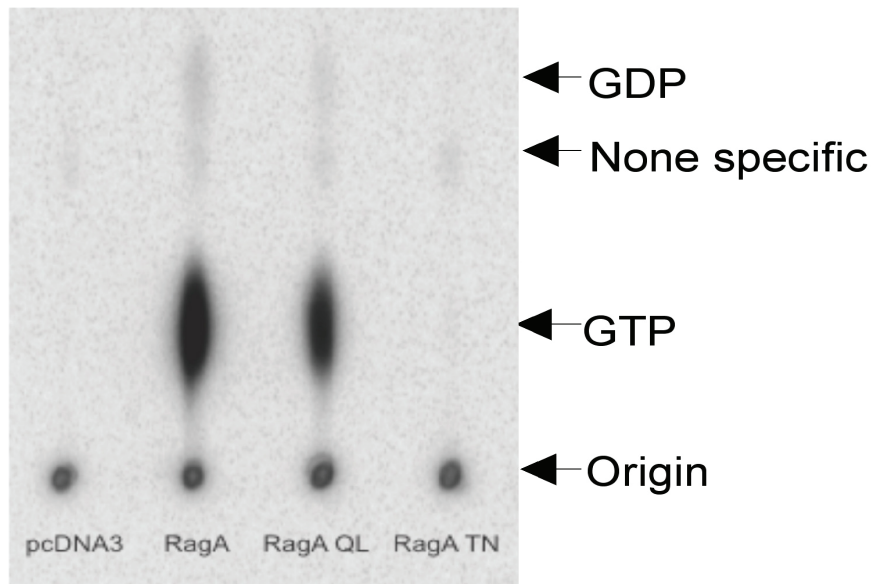

Figure S1

Supplement: NIHMS121517-supplement-1.pdf [file NIHMS121517-supplement-1.pdf]

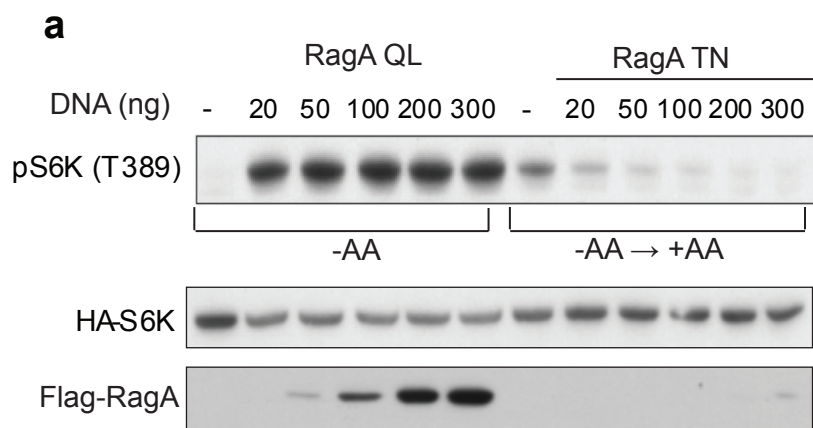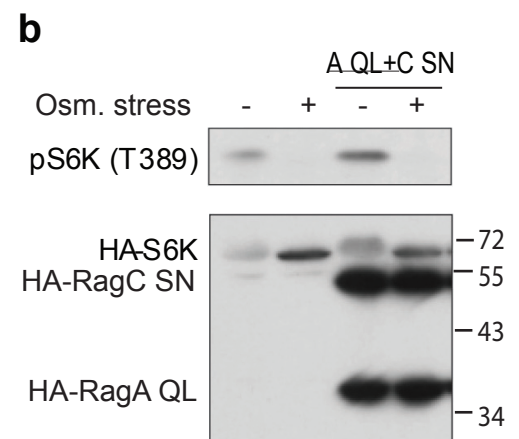

Figure S2

Supplement: NIHMS121517-supplement-2.pdf [file NIHMS121517-supplement-2.pdf]

| Medium  | AA |   | No AA |   | Re-add AA |   |
|---------|----|---|-------|---|-----------|---|
| Insulin | -  | + | -     | + | -         | + |

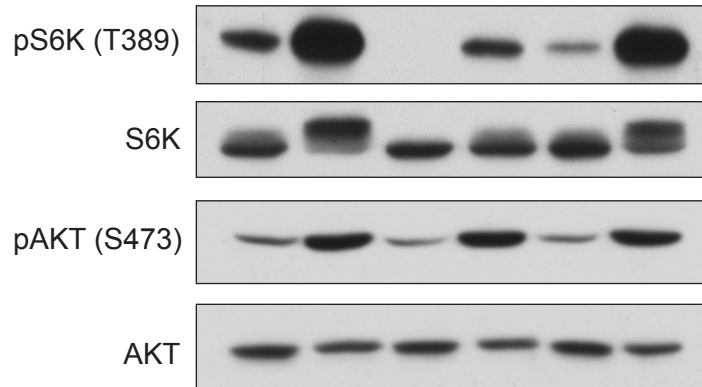

**Figure S3**

Supplement: NIHMS121517-supplement-3.pdf [file NIHMS121517-supplement-3.pdf]

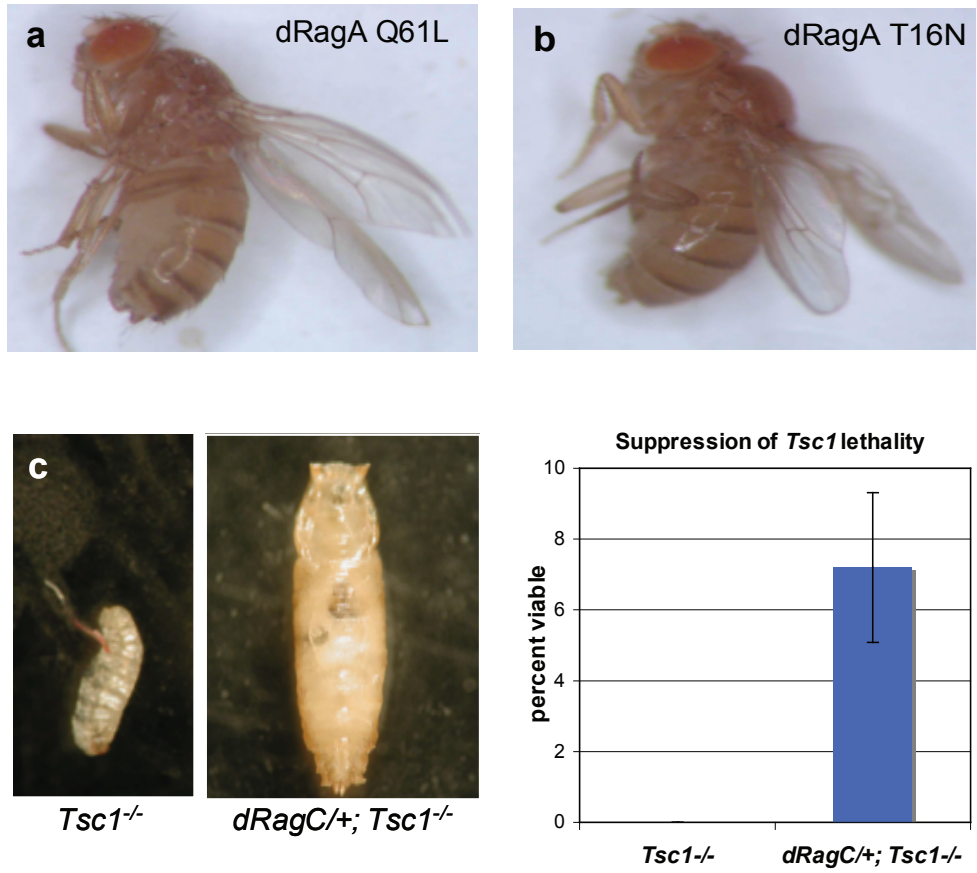

**Figure S4**

Supplement: NIHMS121517-supplement-4.pdf [file NIHMS121517-supplement-4.pdf]

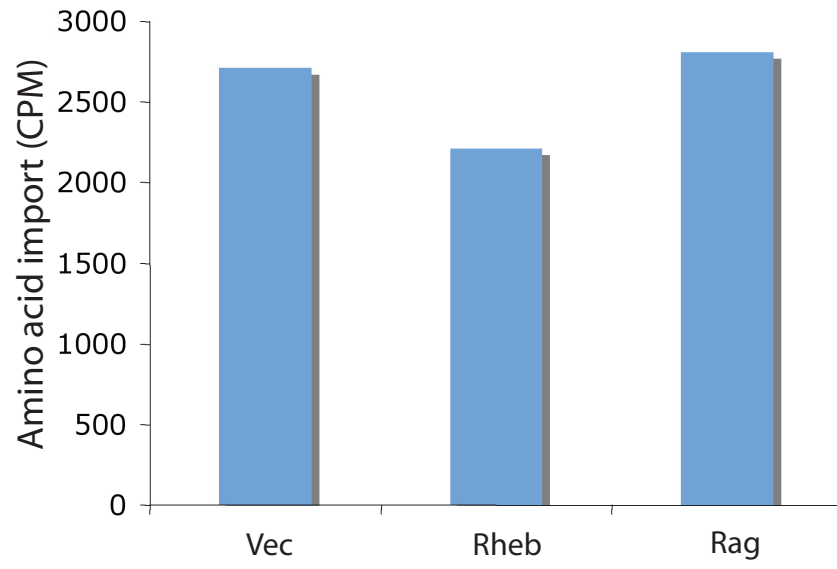

Figure S5

Supplement: NIHMS121517-supplement-5.pdf [file NIHMS121517-supplement-5.pdf]
